# Supplementary material for: An ultrasensitive label-free electrochemical immunosensor based on signal amplification strategy of multifunctional magnetic graphene loaded with cadmium ions
Source: PubMed Central journal article supplement (PMC4754691; doi:10.1038/srep21281), 2016-02-16
Supplement: srep21281-s1.pdf [file srep21281-s1.pdf]

*Supporting Information*

**An ultrasensitive label-free electrochemical immunosensor based on signal amplification strategy of multifunctional magnetic graphene loaded with cadmium ions**

Faying Li<sup>a</sup>, Yueyun Li<sup>a,b</sup>\*, Yunhui Dong<sup>a</sup>, Liping Jiang<sup>a</sup>, Ping Wang<sup>a</sup>, Qing Liu<sup>a</sup>, Hui Liu<sup>a</sup>, Qin

Wei<sup>b</sup>\*

a. School of Chemical Engineering, Shandong University of Technology, Zibo, 255049, P.R. China

b. Key Laboratory of Chemical Sensing & Analysis in Universities of Shandong, School of Chemistry and Chemical Engineering, University of Jinan, Jinan, 250022, P.R. China

\*Corresponding author: liyueyun71@163.com; sdjndxwq@163.com

Tel: + 86 533 2781225; fax: + 86 531 2781664 (Yueyun Li).

Tel: + 86 531 82767872; fax: + 86 531 82767367 (Qin Wei).

**Table S1** The comparison of different immunosensor for the detection of IgG.

| <b>Measurement protocol</b>                | <b>Linear range</b>  | <b>Limit of detection</b> | <b>References</b> |
|--------------------------------------------|----------------------|---------------------------|-------------------|
| Electrochemical immunoassay                | 0.01–200 ng/mL       | 4 pg/mL                   | 1                 |
| Sandwich-type electrochemical immunosensor | 0.01 pg/mL–100 ng/mL | 4.3 fg/mL                 | 2                 |
| Electrochemiluminescence immunosensor      | 7.5-100 pg           | 1.0 pg/mL                 | 3                 |
| Electrochemical immunosensor               | 5 pg-50 ng           | 5.0 pg/mL                 | 4                 |
| Electrochemical immunosensor               | 10 fg/mL-100 pg/mL   | 5.0 fg/mL                 | 5                 |
| Electrochemical immunoassay                | 0.01-10.0 ng/mL      | 6.9 pg/mL                 | 6                 |
| Electrochemical immunosensor               | 5 fg/mL-50 ng/mL     | 2 fg/mL                   | This work         |

**Table S2** Determination of IgG in human serum samples with the proposed immunosensor.

| <b>Initial concentration (ng/mL)</b> | <b>Added concentration (ng/mL)</b> | <b>Measured concentration (ng/mL)</b> | <b>Average value (ng/mL)</b> | <b>RSD (% ,n=5)</b> | <b>Recovery (% , n=5)</b> |
|--------------------------------------|------------------------------------|---------------------------------------|------------------------------|---------------------|---------------------------|
| 1.01                                 | 1.00                               | 1.97, 2.05, 2.09, 1.94, 2.03          | 2.016                        | 3.01                | 100.3                     |
| 1.01                                 | 2.00                               | 2.93, 2.95, 3.01, 3.06, 3.03          | 2.996                        | 1.822               | 99.53                     |
| 1.01                                 | 4.00                               | 4.99, 5.02, 5.09, 5.11, 4.94          | 5.03                         | 1.40                | 100.4                     |

## References

1. Cao, X., Liu, S., Feng, Q. & Wang, N. Silver nanowire-based electrochemical immunoassay for sensing immunoglobulin G with signal amplification using strawberry-like ZnO nanostructures as labels. *Biosens. Bioelectron.* **49**, 256-262 (2013).
2. Zhang, S. et al. Copper-doped titanium dioxide nanoparticles as dual-functional labels for fabrication of electrochemical immunosensors. *Biosens. Bioelectron.* **59**, 335-341 (2014).
3. Tian, D., Duan, C., Wang, W. & Cui, H. Ultrasensitive electrochemiluminescence immunosensor based on luminol functionalized gold nanoparticle labeling. *Biosens. Bioelectron.* **25**, 2290-2295 (2010).
4. Zhang, J., Pearce, M.C., Ting, B.P. & Ying, J.Y. Ultrasensitive electrochemical immunosensor employing glucose oxidase catalyzed deposition of gold nanoparticles for signal amplification. *Biosens. Bioelectron.* **27**, 53-57 (2011).
5. Ding, Y. et al. A water-dispersible, ferrocene-tagged peptide nanowire for amplified

electrochemical immunosensing. *Biosens. Bioelectron.* **48**, 281-286 (2013).

6. Lai, G., Zhang, H., Yong, J. & Yu, A. In situ deposition of gold nanoparticles on polydopamine functionalized silica nanosphere for ultrasensitive nonenzymatic electrochemical immunoassay. *Biosens. Bioelectron.* **47**, 178-183 (2013).
